# Supplementary material
Source: HighWire-hosted journal article supplement (https://cmaj.ca/highwire/filestream/58070/field_highwire_adjunct_files/0/lymph-covens-f.pdf)
Supplement: lymph-covens-f.pdf [file lymph-covens-f.pdf]

## Recherche

## Techniques d'imagerie pour les métastases ganglionnaires lymphatiques dans le cancer du col de l'utérus

Marcus Q. Bernardini MD, Allan Covens MD

Chaque année, le cancer du col de l'utérus touche 1300 Canadiennes et près de 400 en meurent<sup>1</sup>. Le système de stadification du cancer du col de l'utérus repose sur des critères cliniques et à l'heure actuelle, la prise en charge de la maladie dépend de la taille de la lésion primaire et du stade clinique. Au premier stade, on optera pour la chirurgie ( $\leq 1B1$ ) et on appliquera la chimio-radiothérapie dans la maladie avancée ( $> 1B1$ ). Plusieurs études randomisées sur l'exérèse chirurgicale du cancer du col ont mis en évidence les facteurs pronostiques qui influent négativement sur les récurrences ou la survie. Ces facteurs incluent, notamment, la taille importante de la tumeur ( $\geq 4$  cm), l'invasion stromale profonde (tiers externe du stroma cervical), l'atteinte de l'espace vasculaire, l'envahissement du tissu paramétrial, les marges chirurgicales positives et les métastases ganglionnaires lymphatiques<sup>2,3</sup>. En présence de ces facteurs délétères, on recommande habituellement une radiothérapie postopératoire adjuvante. Or, selon certaines observations, chez des patientes qui présentent ces facteurs de risque élevé, il est possible d'obtenir une réduction similaire de la morbidité en recourant principalement à la chimio-radiothérapie plutôt qu'à la chirurgie<sup>4</sup>.

Dans ce numéro du *JAMC*, Selman et ses collaborateurs<sup>5</sup> ont procédé à une revue systématique et à une méta-analyse de la littérature sur la précision diagnostique de l'imagerie par résonance magnétique, de la tomодensitométrie, de la tomographie par émission de positrons et de la biopsie des ganglions sentinelles pour déterminer l'état des ganglions lymphatiques chez des patientes atteintes d'un cancer du col de l'utérus. Ils ont passé en revue 4230 études et après avoir appliqué des critères de sélection rigoureux, ils en ont retenu 72 pour leur analyse finale. Les auteurs ont conclu que la biopsie des ganglions sentinelles était la méthode la plus précise (rapport de probabilité positive de 40,8), suivie de la tomographie par émission de positrons (rapport de probabilité positive de 15,3) pour ce qui est de confirmer un envahissement des ganglions lymphatiques. Bien que l'imagerie par résonance magnétique et la tomодensitométrie soient couramment utilisées pour l'évaluation des ganglions lymphatiques, les auteurs les ont trouvées moins efficaces (rapport de probabilité positive de 6,4 avec l'imagerie par résonance magnétique et de 4,3 avec la tomодensitométrie).

Selman et ses collaborateurs ont aussi fourni des données utiles sur la précision des 4 types d'épreuves présentées dans leur article, mais il y a lieu de se demander pourquoi les auteurs ont inclus la biopsie des ganglions sentinelles dans la même catégorie que les 3 épreuves d'imagerie. La biopsie est sans contredit une intervention chirurgicale en ce sens qu'il

## Points saillants de l'article

- La littérature sur l'imagerie appliquée aux métastases ganglionnaires lymphatiques chez des patientes atteintes d'un cancer du col de l'utérus a tendance à englober tous les stades de la maladie.
- Pour vérifier la possibilité d'appliquer les méthodes d'imagerie, quelles qu'elles soient, et changer en conséquence la prise en charge clinique, il faudra obtenir des rapports de probabilité positive très élevés dès les premiers stades du cancer du col et des rapports de probabilité négative très élevés dans le cancer du col avancé.
- La biopsie des ganglions sentinelles diffère de l'imagerie par résonance magnétique, de la tomодensitométrie et de la tomographie par émission de positrons en ce sens qu'il s'agit d'une intervention chirurgicale.
- Des études se penchent actuellement sur le rôle de l'imagerie dans le cancer du col de l'utérus avancé lorsqu'on veut préciser l'ampleur de la maladie.

s'agit d'une lymphadénectomie partielle. On présume que leur choix d'inclure cette méthode repose sur le peu d'effets secondaires qui lui sont associés. En majeure partie, les articles sur la biopsie des ganglions sentinelles s'intéressent aux premiers stades de la maladie et explorent l'utilisation de cette méthode dans le cadre d'une intervention d'exérèse chirurgicale visant à réduire la morbidité peropératoire et postopératoire inhérente à la lymphadénectomie. C'est cette stratégie qui prévaut dans la prise en charge chirurgicale du mélanome, du cancer du sein et du cancer vulvaire. Dans le cancer avancé, le rôle de la biopsie des ganglions sentinelles reste à confirmer. Les données obtenues auprès de cette population de patients indiquent que le taux de résultats faux négatifs est proportionnel au nombre de biopsies des ganglions sentinelles<sup>6</sup>. De plus, étant donné qu'en présence d'un cancer du col de l'utérus, les ganglions lymphatiques sentinelles se trouvent en majeure partie au niveau pelvien et que les champs d'irradiation standard englobent cette région de propagation potentielle, on met en doute son rôle clinique dans la prise en charge de la maladie avancée.

Des exemples de comparaisons des 3 méthodes d'imagerie utilisées pour le dépistage des ganglions lymphatiques positifs sont proposés aux Figure 1, Figure 2, Figure 3 et Fig-

Les auteurs sont attachés à la division de gynéco-oncologie du département d'obstétrique et de gynécologie du Sunnybrook Health Sciences Centre, affilié à l'Université de Toronto, Toronto (Ont.)

ure 4. La possibilité d'appliquer une méthode d'imagerie très précise aura des répercussions différentes pour les patientes selon que leur maladie en est à un stade précoce ou à un stade avancé. Au stade précoce, le défi clinique consiste à dépister la maladie métastatique à l'échelle microscopique. À ce stade, les patientes seraient mieux servies par une chimio-radiothérapie adjuvante ou primaire qui leur épargnerait entièrement la chirurgie. Par contre, la faible incidence des métastases aux ganglions lymphatiques chez ces patientes fait en sorte que ces méthodes, quelles qu'elles soient, risquent peu d'être utiles en pratique. La biopsie des ganglions sentinelles convient bien dans un tel contexte, parce qu'elle est souvent alliée à une exérèse chirurgicale et parce qu'elle présente le rapport de probabilité positive le plus élevé et le rapport de

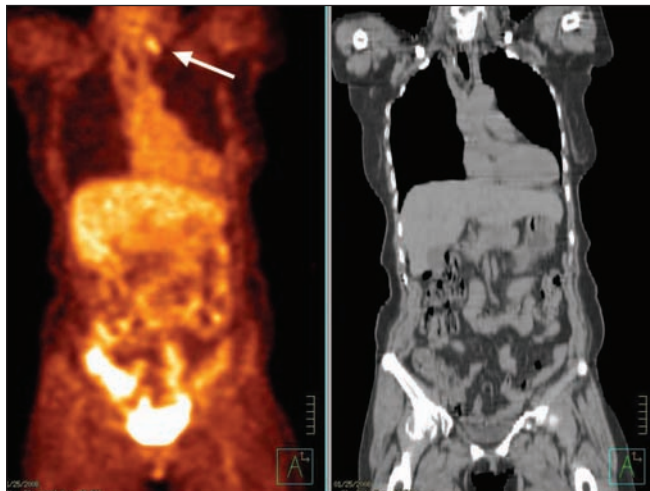

**Figure 1 :** Tomographie par émission de positrons (à gauche) révélant la présence d'un ganglion lymphatique supraclaviculaire positif. Tomodensitométrie (à droite) de la même zone qui illustre la capacité supérieure de la tomographie par émission de positrons à révéler la présence des métastases.

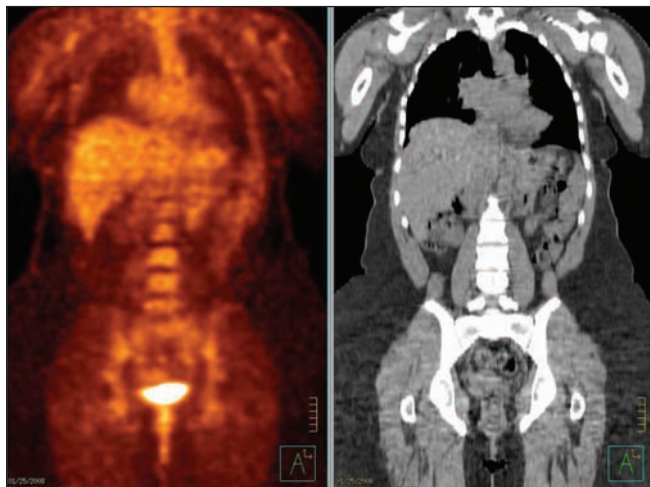

**Figure 2 :** La tomographie par émission de positrons (à gauche) ne révèle aucune métastase. La tomodensitométrie correspondante se trouve à droite.

probabilité négative le plus faible. Par comparaison, Selman et ses collègues signalent un rapport de probabilité positive de 15,3 associé à la tomographie par émission de positrons. Étant donné que la plupart des études sur les premiers stades du cancer du col ont mentionné une incidence des métastases ganglionnaires lymphatiques inférieure à 10 %<sup>7</sup>, la probabilité

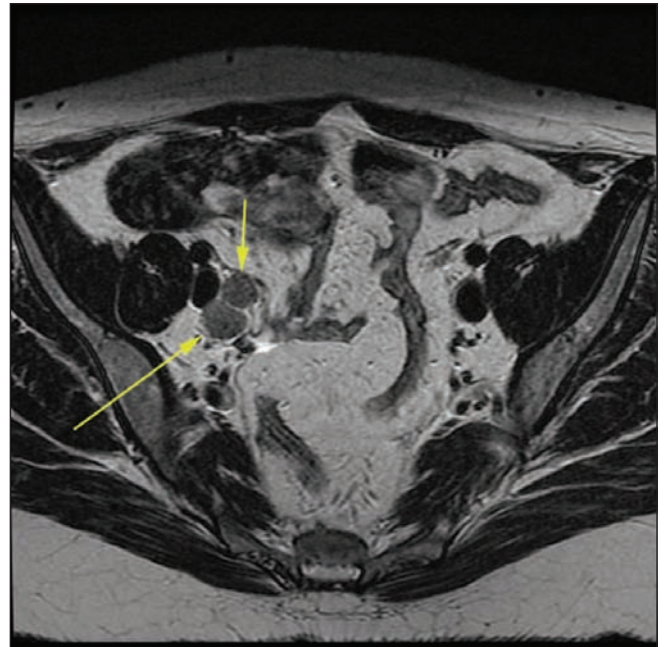

**Figure 3 :** Imagerie par résonance magnétique illustrant 2 ganglions lymphatiques visiblement positifs (flèches) faisant pression sur les vaisseaux iliaques droits.

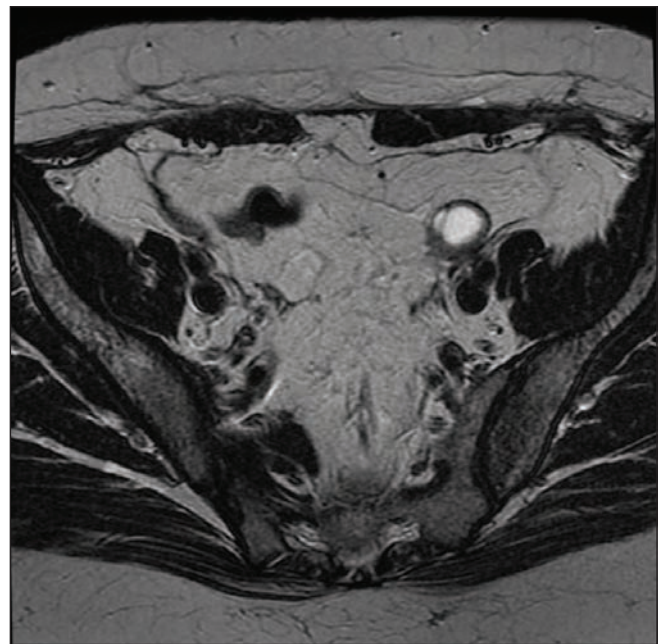

**Figure 4 :** Imagerie par résonance magnétique ne montrant aucun signe de propagation métastatique. La structure qui surmonte les vaisseaux iliaques gauches est un ovaire kystique.

post-test d'un résultat positif à la tomographie par émission de positrons sera d'environ 60 %. Cela suffira-t-il à justifier une modification de la prise en charge de la maladie? Pour les patientes dont le cancer du col est avancé, le défi consiste à préciser l'étendue de la maladie (y compris sa propagation aux ganglions para-aortiques et distaux) pour offrir le traitement le mieux adapté possible. Ces patientes ont peu de chances d'être opérées et l'ampleur et la localisation des métastases lymphatiques guideront la chimio-radiothérapie. Comme nous l'avons mentionné plus tôt, dans la maladie avancée, le dépistage d'une métastase ganglionnaire lymphatique au niveau pelvien influera peu sur les décisions thérapeutiques, et des méthodes d'imagerie précises permettant de confirmer une maladie extra-pelvienne sont indispensables chez ces patientes. Compte tenu du peu de données disponibles, on ignore quel est le rapport de probabilité positive précis associé à la tomographie par émission de positrons pour l'identification des métastases lymphatiques para-aortiques.

La responsabilité financière et l'analyse coûts-avantages deviennent d'importants facteurs à considérer, compte tenu des coûts croissants des soins de santé. À l'heure actuelle, dans les pays industrialisés, la plupart des femmes atteintes de cancer du col de l'utérus subissent des tests d'imagerie par résonance magnétique. L'analyse de Selman et ses collaborateurs<sup>5</sup> a confirmé qu'à des fins diagnostiques, l'imagerie par résonance magnétique ne convient pas au dépistage des métastases ganglionnaires lymphatiques. Par contre, c'est une méthode d'imagerie couramment utilisée pour déterminer l'ampleur de la maladie localisée et orienter la chimio-radiothérapie. Si la tomographie par émission de positrons permet d'évaluer plus précisément la propagation lymphatique, les patientes atteintes d'un cancer du col devraient-elles toutes subir une imagerie par résonance magnétique et une tomographie par émission de positrons? Étant donné que de nos jours la tomographie par émission de positrons va de pair avec la tomodensitométrie, les patientes devraient-elles subir les 3 types d'épreuves? Le nombre actuellement limité d'appareils de tomographie par émission de positrons et leur accès restreint représentent d'importants obstacles auxquels doivent s'attaquer les ministères provinciaux de la santé.

Des études sont en cours pour trouver des méthodes d'imagerie plus précises. Le Gynecologic Oncology Group [Groupe de gynéco-oncologie] et l'American College of Radiology Imaging Network [Réseau pour l'imagerie du Collège américain de radiologie] réalisent en effet une étude pour comparer entre elles la tomographie par émission de positrons avec fludésoxyglucose F 18, la tomodensitométrie et l'imagerie par résonance magnétique avec ferumoxtran-10 pour le dépistage des métastases ganglionnaires lymphatiques dans le cancer du col de l'utérus avancé. Si la dernière méthode se révèle aussi précise que la tomographie par émission de positrons pour le dépistage des métastases, elle pour-

rait éventuellement être utilisée seule pour l'évaluation complète du cancer de col de l'utérus localisé et métastatique. Quand on aura déterminé quelle méthode d'imagerie convient le mieux, l'étape suivante consistera à réaliser une étude contrôlée et randomisée pour la comparer au traitement standard, la survie servant de paramètre principal. Compte tenu de la précision, de l'accessibilité et du coût actuels des méthodes d'imagerie et du nombre de patientes, une telle étude risque toutefois d'être difficile à réaliser.

Les études sur les épreuves d'imagerie et la biopsie des ganglions sentinelles analysées par Selman et ses collaborateurs incorporent tous les stades du cancer du col de l'utérus et définissent comme résultat positif la présence de toute métastase ganglionnaire lymphatique, peu importe sa localisation. Cela représente une lacune majeure dans la littérature et nuit à la validation adéquate des méthodes d'imagerie. Malgré cela, Selman et ses collaborateurs ont confirmé le rôle de la biopsie des ganglions sentinelles dans la prise en charge des premiers stades du cancer du col. Ils ont aussi mis en lumière la promesse que recèle la tomographie par émission de positrons et encouragent la poursuite des recherches en vue de trouver de meilleures méthodes de dépistage des métastases du cancer du col de l'utérus. Les enjeux soulevés dans ce commentaire, y compris le siège des métastases ganglionnaires, le coût des ressources et leur accessibilité, restent problématiques.

**Intérêts concurrents :** Aucun déclaré.

**Auteurs :** Les 2 auteurs ont contribué à la conception et à l'élaboration du manuscrit. Ils en ont rédigé et révisé la première ébauche et en ont approuvé la version finale pour publication.

## RÉFÉRENCES

1. Institut national du cancer du Canada. Statistiques canadiennes sur le cancer 1997. Toronto : The Institute, 1997.
2. Peters WA III, Liu PY, Barrett RJ II et coll. Concurrent chemotherapy and pelvic radiation therapy compared with pelvic radiation therapy alone as adjuvant therapy after radical surgery in high-risk early-stage cancer of the cervix. *J Clin Oncol* 2000;18:1606-13.
3. Sedlis A, Bundy BN, Rotman M et coll. A randomized trial of pelvic radiation therapy versus no further therapy in selected patients with stage IB carcinoma of the cervix after radical hysterectomy and pelvic lymphadenectomy: a Gynecologic Oncology Group study. *Gynecol Oncol* 1999;73:177-83.
4. Landoni F, Manco A, Colombo A et coll. Randomised study of radical surgery versus radiotherapy for stage Ib-IIa cervical cancer. *Lancet* 1997;350:535-40.
5. Selman TJ, Mann C, Zamora J et coll. Diagnostic accuracy of tests for lymph node status in primary cervical cancer: a systematic review and meta-analysis. *CMAJ* 2008;178:855-62.
6. Wydra D, Sawicki S, Wojtylak S et coll. Sentinel node identification in cervical cancer patients undergoing transperitoneal radical hysterectomy: a study of 100 cases. *Int J Gynecol Cancer* 2006;16:649-54.
7. Grisar DA, Covens A, Franssen E et coll. Histopathologic score predicts recurrence free survival after radical surgery in patients with stage IA2-IB1-2 cervical carcinoma. *Cancer* 2003;97:1904-8.

**Correspondance :** Dr. Allan Covens, Division of Gynaecologic Oncology, Department of Obstetrics and Gynaecology, Sunnybrook Health Sciences Centre; 2075, ave. Bayview, Toronto ON M4N 3M5; téléc. 416 480-6002; al.covens@sunnybrook.ca
